# Supplementary material for: High failure rate after internal fixation and beneficial outcome after arthroplasty in treatment of displaced femoral neck fractures in patients between 55 and 70 years: An observational study of 2,713 patients reported to the Norwegian Hip Fracture Register
Source: PubMed Central journal article supplement — Acta Orthop. 2017 Sep 15;89(1):53–8. doi: 10.1080/17453674.2017.1376514 (PMC5810833; doi:10.1080/17453674.2017.1376514), 2017-09-15
Supplement: IORT_A_1376514_SM1023.pdf [file IORT_A_1376514_SM1023.pdf]

## Supplementary data

Table 2. Types of implants used as primary treatment

| Implant                            | n (%)    | n (%)      |
|------------------------------------|----------|------------|
| Screws or pins                     |          | 1,111 (41) |
| Olmed (DePuy)                      | 650 (59) |            |
| Richards CHP (Smith and Nephew)    | 297 (27) |            |
| Hansson Pin System (Swemac)        | 118 (11) |            |
| Asnis III (Stryker)                | 46 (4.1) |            |
| Hemiarthroplasty                   |          | 1,030 (38) |
| Exeter/V40, Cemented (Stryker)     | 360 (35) |            |
| Corail, Uncemented (DePuy)         | 235 (23) |            |
| Charnley, Cemented (DePuy)         | 137 (13) |            |
| Charnley Modular, Cemented (DePuy) | 63 (6.1) |            |
| Lubinus SP II, Cemented (Link)     | 59 (5.7) |            |
| Other                              | 176 (17) |            |
| Total hip arthroplasty             |          | 572 (21)   |
| Corail, Uncemented (DePuy)         | 170 (30) |            |
| Exeter, Cemented (Stryker)         | 134 (23) |            |
| Charnley, Cemented (DePuy)         | 66 (12)  |            |
| Charnley Modular, Cemented (DePuy) | 47 (8.2) |            |
| Filler, Uncemented (Biotechni)     | 36 (6.3) |            |
| Other                              | 119 (21) |            |

Table 4. Comparison of baseline characteristics for responders, non-responders, and non-receivers

|                        | Responders<br>(n = 549) | Non-responders<br>(n = 810) | p-value              | Non-receivers<br>(n = 1,354) | p-value              |
|------------------------|-------------------------|-----------------------------|----------------------|------------------------------|----------------------|
| Mean age (SD)          | 63.7 (4.0)              | 63.5 (4.0)                  | 0.9 <sup>a</sup>     | 63.6 (4.1)                   | 0.7 <sup>a</sup>     |
| Female sex (%)         | 373 (68)                | 509 (63)                    | 0.1 <sup>b</sup>     | 868 (64)                     | 0.1 <sup>b</sup>     |
| ASA classification (%) |                         |                             | < 0.001 <sup>b</sup> |                              | < 0.001 <sup>b</sup> |
| ASA 1                  | 152 (28)                | 132 (16)                    |                      | 221 (16)                     |                      |
| ASA 2                  | 248 (45)                | 337 (42)                    |                      | 578 (43)                     |                      |
| ASA 3                  | 142 (26)                | 315 (39)                    |                      | 485 (36)                     |                      |
| ASA 4–5                | 7 (1.3)                 | 26 (3.2)                    |                      | 70 (5.2)                     |                      |
| Operation type (%)     |                         |                             | < 0.001 <sup>b</sup> |                              | < 0.001 <sup>b</sup> |
| IF                     | 259 (47)                | 365 (45)                    |                      | 487 (36)                     |                      |
| HA                     | 148 (27)                | 311 (38)                    |                      | 571 (42)                     |                      |
| THA                    | 142 (26)                | 134 (17)                    |                      | 296 (22)                     |                      |

<sup>a</sup> Independent t-test; <sup>b</sup> Pearson chi-square test.

Table 5. Baseline data for responders (PROM)

| Baseline data          | Operation type  |                 |                  | p-value              |
|------------------------|-----------------|-----------------|------------------|----------------------|
|                        | IF<br>(n = 259) | HA<br>(n = 148) | THA<br>(n = 142) |                      |
| Mean age (SD)          | 62.7 (4.0)      | 65.7 (3.1)      | 63.6 (3.9)       | < 0.001 <sup>a</sup> |
| Female sex (%)         | 155 (60)        | 109 (74)        | 109 (77)         | 0.001 <sup>b</sup>   |
| ASA classification (%) |                 |                 |                  | < 0.001 <sup>b</sup> |
| ASA 1                  | 92 (36)         | 20 (14)         | 40 (28)          |                      |
| ASA 2                  | 123 (48)        | 64 (43)         | 61 (43)          |                      |
| ASA 3                  | 42 (16)         | 60 (41)         | 40 (28)          |                      |
| ASA 4–5                | 2 (0.8)         | 4 (2.7)         | 1 (0.7)          |                      |

<sup>a</sup> ANOVA; <sup>b</sup> Pearson chi-square.
